# Supplementary material for: Cell–cell and cell–extracellular matrix adhesions cooperate to organize actomyosin networks and maintain force transmission during dorsal closure
Source: PubMed Central journal article supplement — Mol Biol Cell. 2017 May 15;28(10):1301–10. doi: 10.1091/mbc.E17-01-0033 (PMC5426845; doi:10.1091/mbc.e17-01-0033), 2017-05-15
Supplement: supp_E17-01-0033v1_CombinedSupMats.pdf [file supp_E17-01-0033v1_CombinedSupMats.pdf]

# Supplemental Materials

*Molecular Biology of the Cell*

Goodwin et al.

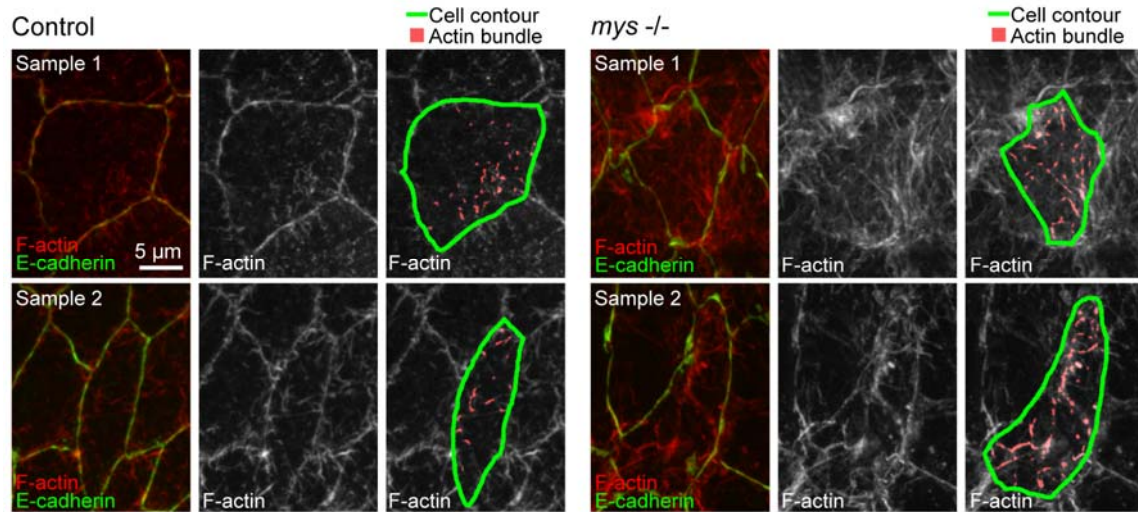

**Supplementary Figure 1. Quantification of actin bundles in AS cells.**

2 sample images each for control and *mys*<sup>-/-</sup> embryos stained for E-cadherin and F-actin (Rhodamine Phalloidin) (left), F-actin alone (middle) and F-actin with quantification overlaid (right) are shown. Bundles identified from filtered and thresholded images are shown in red, and cell contours are shown in green.
